# Supplementary material for: In situ synthesis of metal–organic frameworks in a porous polymer monolith as the stationary phase for capillary liquid chromatography
Source: Royal Society of Chemistry journal article supplement (doi:10.1039/c5an00079c), 2015-01-01
Supplement: c5an00079c1.pdf [file c5an00079c1.pdf]

## Supplementary Data

### **In situ synthesis of metal-organic frameworks in porous polymer monolith as stationary phase for capillary liquid chromatography**

Shengchao Yang, Fanggui Ye\*, Cong Zhang, Shufen Shen and Shulin Zhao

Key Laboratory for the Chemistry and Molecular Engineering of Medicinal Resources  
(Ministry of Education of China), College of Chemistry and Pharmaceutical Science,  
Guangxi Normal University, Guilin, Guangxi, 541004, China.

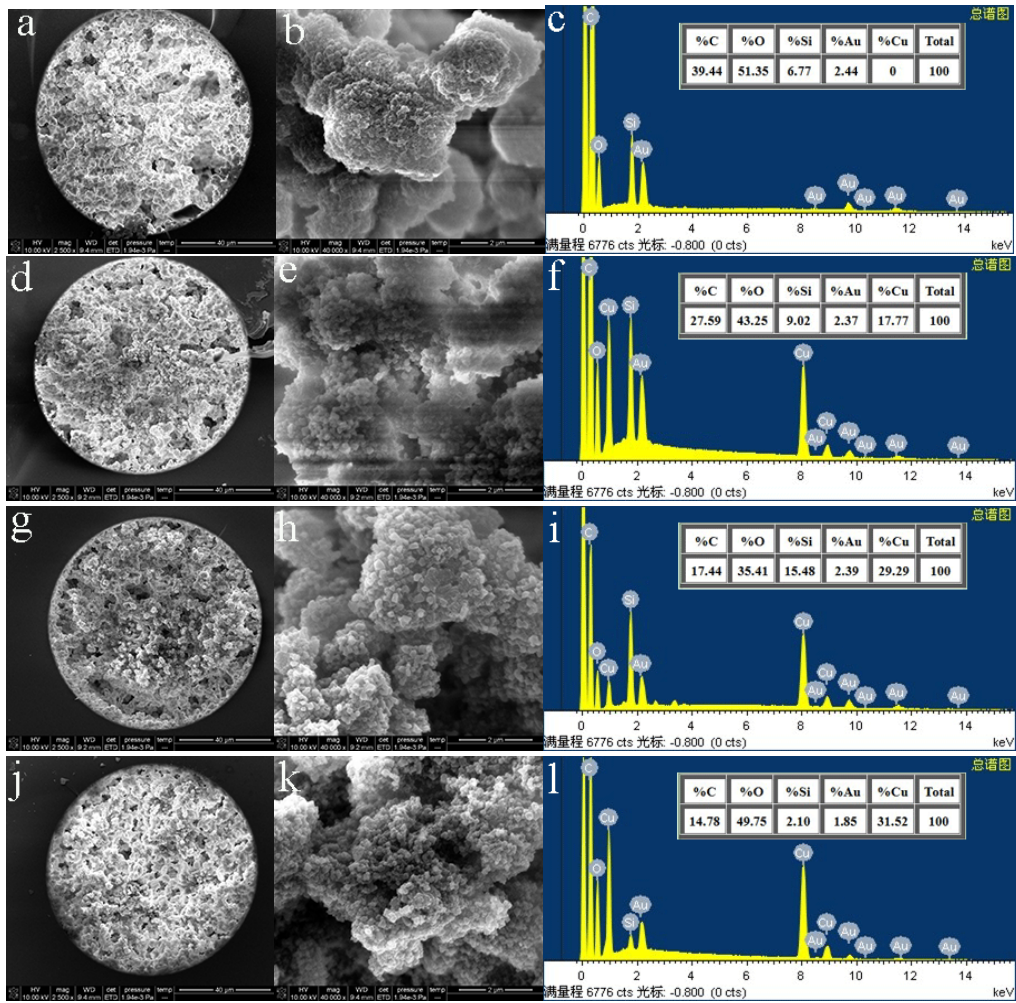

Fig. S1 SEM-EDS spectrum of 0-LC (a-c), 2-LC (d-f), 4-LC (g-i) and 6-LC (j-l) monoliths.

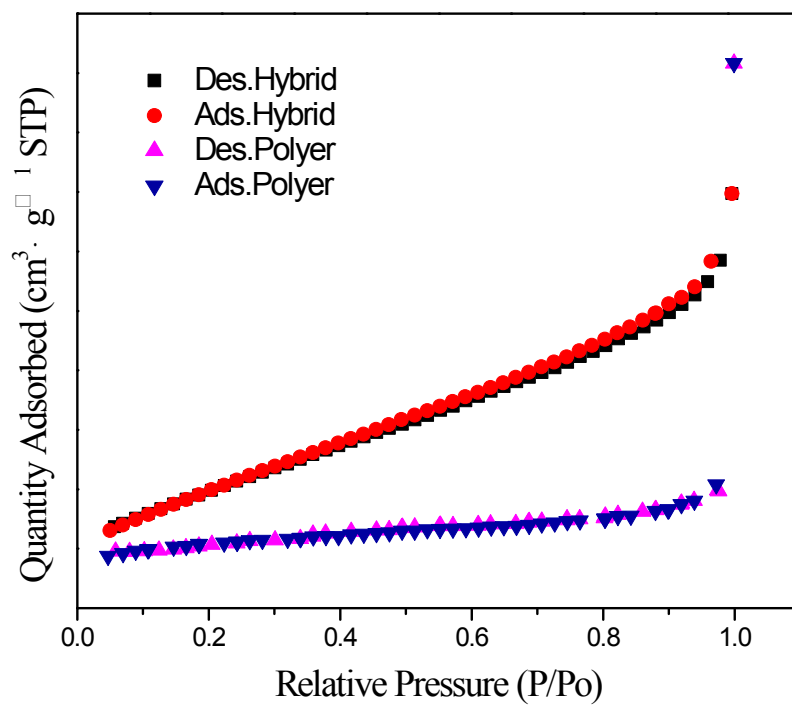

Fig. S2 N<sub>2</sub> sorption isotherm of 0-LC and 2-LC monoliths.

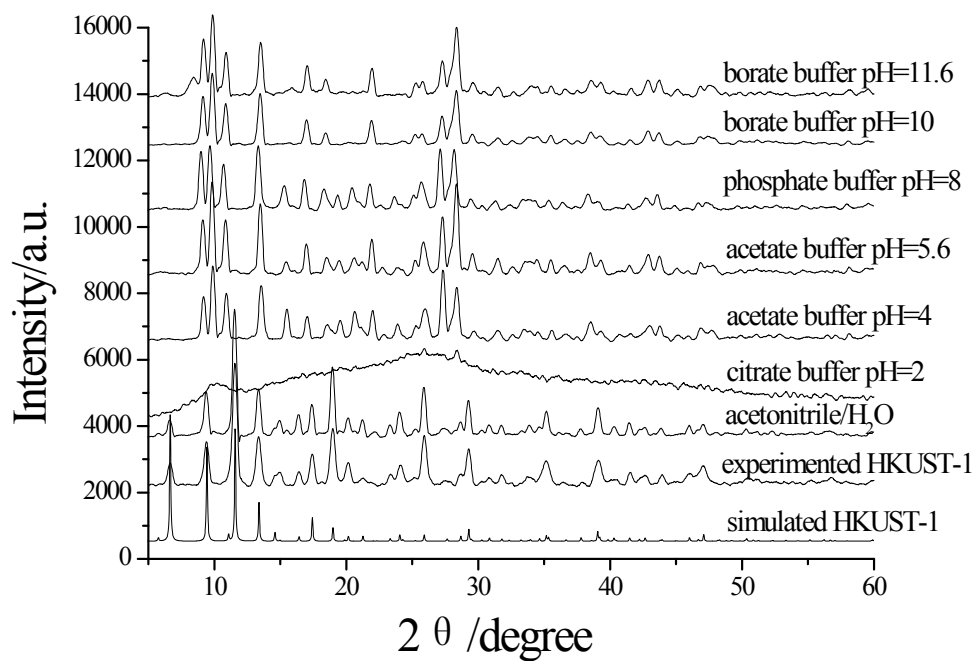

Fig. S3 XRD patterns of the simulated, experimented HKUST-1 and HKUST-1 treated in buffers with different pH values for 24 h.

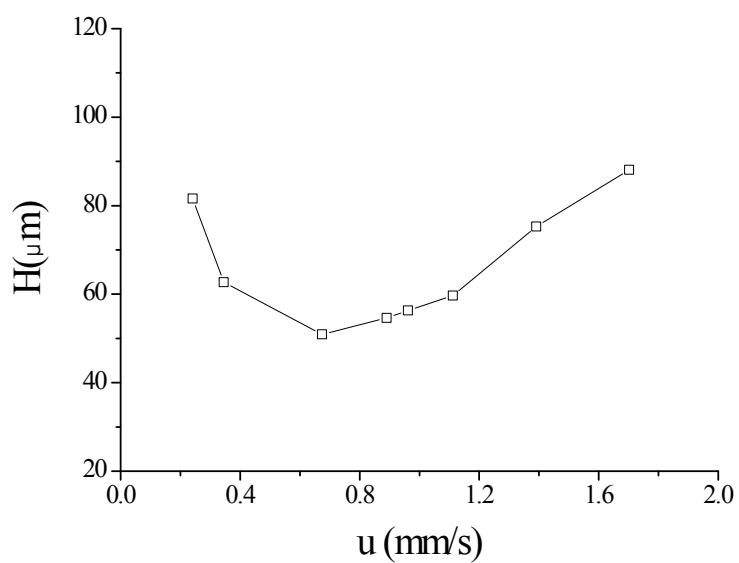

Fig. S4 Van Deemter curves of *p*-benzenediol on 6-LC monolith. Experimental conditions: mobile phase, acetonitrile/H<sub>2</sub>O (40/60, v/v), detection wavelength, 214 nm; pump flow: 0.05 mL/min; applied different pressure. monoliths: 36 cm×100 μm id (26 cm effective length).

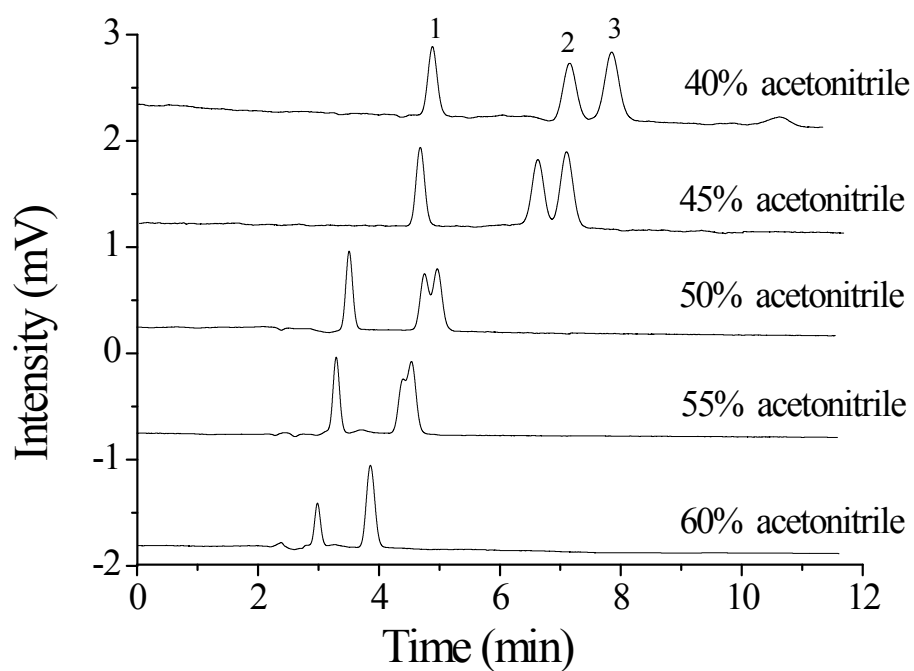

Fig. S5 Chromatograms of the benzenediols on 6-LC monolith.

Conditions: mobile phase, 40%-60% (v/v) acetonitrile; flow rate, 0.05mL/min; UV detection at 214 nm; supplement pressure, 1000 psi. Solutes 1, *p*-benzenediol; 2, *m*-benzenediol; 3, *o*-benzenediol.

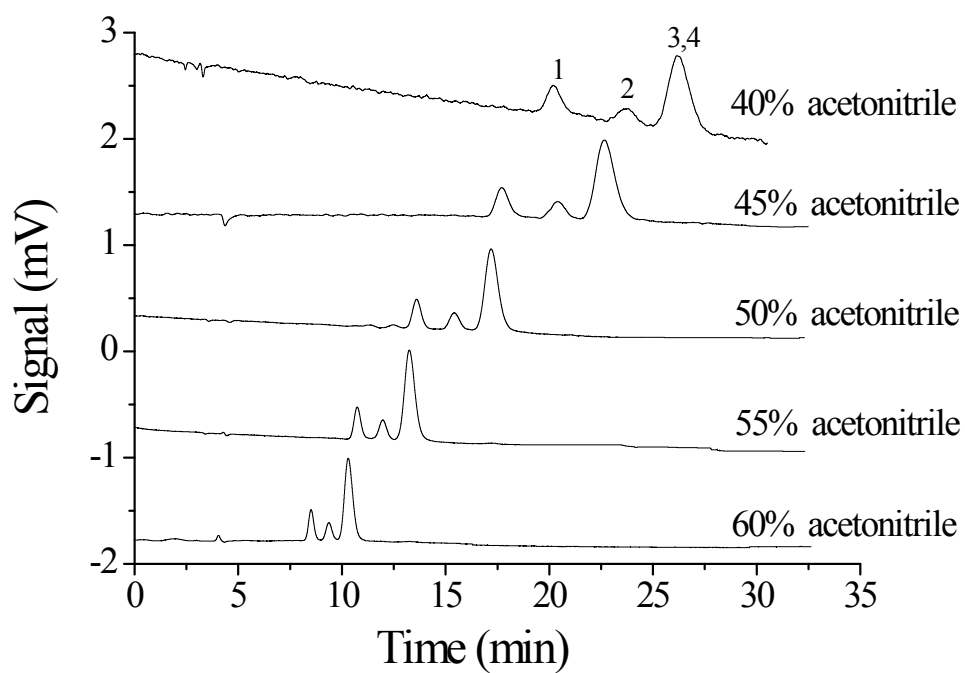

Fig. S6 Chromatograms of ethylbenzene and xylenes on 6-LC monolith.

Conditions: mobile phase, 40%-60% (v/v) acetonitrile. Other conditions were the same as those in

Fig. S5. Solutes 1, ethylbenzene; 2, *p*-xylene; 3, *m*-xylene; 4, *o*-xylene.

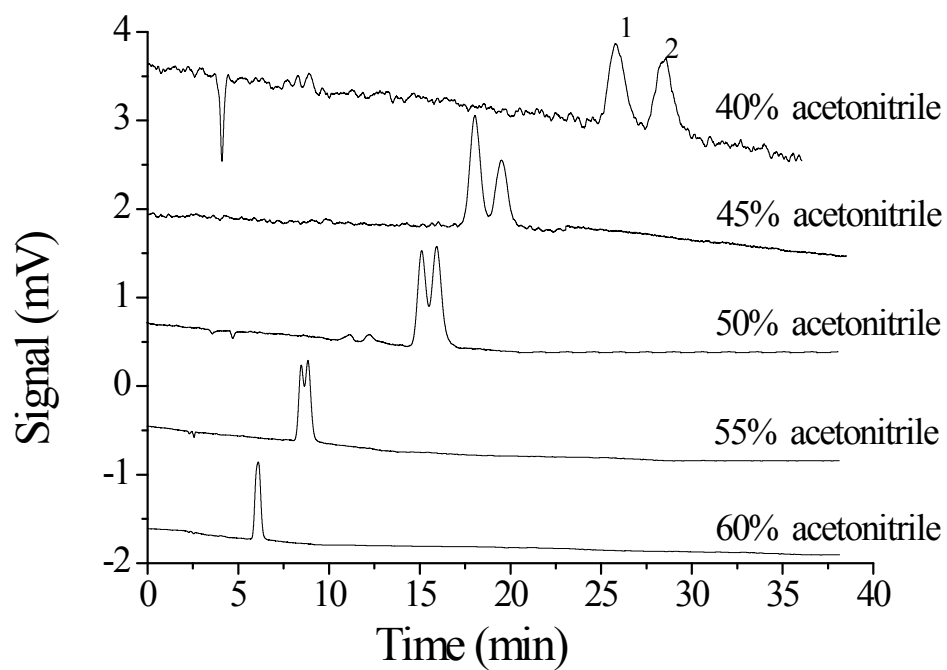

Fig. S7 Chromatograms of the ethylbenzene and styrene on 6-LC monolith.

Conditions: mobile phase, 40%-60% (v/v) acetonitrile. Other conditions were the same as those in

Fig. S5. Solutes 1, ethylbenzene; 2, styrene.



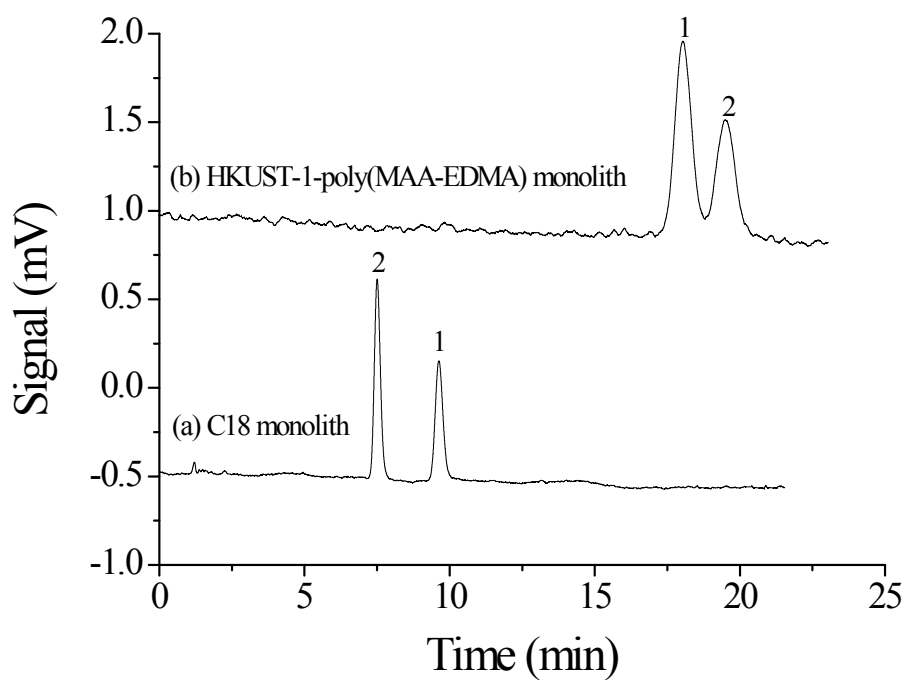

Fig. S8 Chromatograms of ethylbenzene and styrene on C18 and 6-LC monoliths

Conditions: mobile phase, acetonitrile/H<sub>2</sub>O (45/55, v/v). Other conditions were the same as those in Fig. S5. Solutes 1, ethylbenzene; 2, styrene.
